# Supplementary material for: Staphylococcus epidermidis isolates from atopic or healthy skin have opposite effect on skin cells: potential implication of the AHR pathway modulation
Source: Front Immunol. 2023 May 26;14:1098160. doi: 10.3389/fimmu.2023.1098160 (PMC10250813; doi:10.3389/fimmu.2023.1098160)
Supplement: Supplementary file 6 [file Table_5.xlsx]

## Sheet: Concentrations
Table T5 : Metabolites quantification in the S. epidermidis supernatants ; ionization parameters and quality control.
Concentration (pmol/mL or nmol/mL*)
	Tryptophane*		Kynurenine	Kynurenic acid	3-OH-Kynurenine	Xanthurenic acid	3-OH-Anthranilic acid	Picolinic acid	Quinolinic acid		Serotonine	5-OH-Tryptophane	5-OH-Indole acetic acid	N-acetyl-serotonine		Indole-3-Lactic acid	Indole-3-Aldehyde	Indole-3-Acetic acid	Tryptamine	Indole-3-Sulfate	Indole-3-acetamide	Tryptophol		Total kynurenine pathway	Total indoles pathway
Control (culture medium)	54.9942		120.7	1.538	2.94	1.214	< 0.55	< 6.0	4.262		43.782	0.642	< 3.75	< 0.008		< 2.75	9.25	< 1.6	1.906	< 0.95	< 0.035	< 0.95		130.654	11.156
Control (culture medium)	56.2515		113.89	1.546	3.246	1.122	< 0.55	< 6.0	5.918		43.464	0.678	< 3.75	< 0.008		< 2.75	9.432	< 1.6	1.982	< 0.95	< 0.035	< 0.95		125.722	11.414
12228	42.7107		88.494	4.686	6.81	3.188	< 0.55	628.606	6.744		< 4.0	2.43	< 3.75	< 0.008		243.47	75.208	55.562	< 0.145	< 0.95	< 0.035	< 0.95		738.528	374.24
48	49.607		143.018	2.994	3.796	1.688	< 0.55	878.126	5.46		25.14	1.602	< 3.75	< 0.008		141.086	30.452	19.346	4.122	< 0.95	< 0.035	< 0.95		1035.08	195.006
52B	24.8038		57.288	5.076	5.156	< 0.245	< 0.55	634.258	5.038		24.588	0.864	< 3.75	< 0.008		225.936	117.896	98.614	< 0.145	< 0.95	< 0.035	< 0.95		706.816	442.446
1190	24.8141		53.13	8.582	5.072	< 0.245	< 0.55	383.988	5.562		23.266	1.138	< 3.75	< 0.008		190.464	231.608	82.748	< 0.145	< 0.95	< 0.035	< 0.95		456.334	504.82
1191	32.8974		75.038	8.336	4.312	< 0.245	< 0.55	54.436	5.066		28.32	1.41	< 3.75	< 0.008		249.138	95.948	143.736	207.528	< 0.95	< 0.035	< 0.95		147.188	696.35
45	20.6561		48.752	4.15	5.228	< 0.245	< 0.55	617.748	5.67		24.052	0.954	< 3.75	< 0.008		291.946	133.912	96.448	< 0.145	< 0.95	< 0.035	< 0.95		681.548	522.306
R10C	33.8565		58.49	9.734	5.82	< 0.245	< 0.55	519.894	3.944		23.386	1.438	< 3.75	< 0.008		237.284	300.252	101.96	< 0.145	< 0.95	< 0.035	< 0.95		597.882	639.496
500	27.9062		72.576	4.228	3.282	1.288	< 0.55	376.59	5.172		25.44	1.538	< 3.75	< 0.008		241.906	184.472	145.612	< 0.145	< 0.95	< 0.035	< 0.95		463.136	571.99
11H	54.5161		10436	22.676	11.658	< 0.245	< 0.55	776.914	7.12		23.32	2	< 3.75	< 0.008		224.612	172.118	147.768	484.236	< 0.95	< 0.035	< 0.95		11254.4	1028.73
492	37.4409		74.856	5.654	2.95	1.102	< 0.55	16.494	4.796		29.548	1.15	< 3.75	< 0.008		548.046	175.114	165.884	5.704	< 0.95	< 0.035	< 0.95		105.852	894.748
44	39.8895		103.94	4.464	2.7	< 0.245	< 0.55	30.568	5.184		27.548	1.472	< 3.75	< 0.008		135.85	102.34	152.322	2.894	< 0.95	< 0.035	< 0.95		146.856	393.406
45A5	58.2362		109.206	3.882	2.774	0.982	< 0.55	48.418	1.942		25.24	2.08	< 3.75	< 0.008		102.97	45.992	24.846	3.916	< 0.95	< 0.035	< 0.95		167.204	177.724
45A6	38.8022		89.898	7.848	7.494	< 0.245	< 0.55	< 6.0	6.442		23.496	1.804	< 3.75	0.022		166	93.556	90.558	4.8	< 0.95	< 0.035	< 0.95		111.682	354.914

## Sheet: Ionization parameters
Standard and ionization parameters used for metabolites quantification in the S. epidermidis supernatants.
Range concentration (pmol/ml)	Retention time (min)	ID chromatogramme	Metabolites	Sandard used	Standard concentration (pmol/mL)	Ionisation	Molecular ion (parent ion)	Fragment ion	Dwell time(s)	cone voltage (V)	Collision energy (eV)
37,5 - 25000	1.01	18	Picolinic acid	Picolinic-d3 Acid	2000	Positive	125.1	79	0.044	20	16
1,5 - 1000	1.15	1	3-OH-kynurenin	3-Hydroxy Kynurenine- 13C2,13N	20	Positive	225.1	110.1	0.044	5	5
1,13 - 750	1.26	19	Quinolinic acid	QUIN-d3	250	Negative	166.1	78	0.044	10	11
37,5 - 25000	1.39	2	Serotonin	Serotonin-d4	2000	Positive	177.2	160.2	0.044	10	30
0,75 - 500	1.68	3	5-Hydroxytryptophan	5-Hydroxy L-Tryptophan-d4	40	Positive	221.1	162.1	0.044	10	14
37,5 - 25000	1.87	4	Kynurenin	L-Kynurenin-d4	50	Positive	209.1	94.1	0.044	10	45
1,5 - 1000	2.41	5	3-OH-anthranilic acid	3-Hydroxyanthranilic Acid-d3	50	Positive	154.2	136.1	0.044	10	13
0,75 - 500	3.01	6	Tryptamin	Tryptamin-d4	20	Positive	161.2	144.1	0.197	30	12
300 - 200000	3.36	7	Tryptophan	L-Tryptophan-d5	2000	Positive	205.1	188.1	0.197	5	25
3 - 2000	4.23	8	5-Hydroxyindole acetic acid	5-Hydroxyindole-3-acetic acid-d5	75	Positive	192.1	146.1	0.066	10	35
112,5 - 75000	4.92	20	Indoxyl-3-Sulfate	I-3-sulfate 13C6	1000	Negative	212	80	0.066	10	10
0,15 - 100	5.05	9	N-acetylserotonin	Xanthurenic Acid d-4	20	Positive	219.1	160.1	0.066	5	16
1,5 - 1000	5.67	10	Xanthurenic Acid	Xanthurenic Acid d-4	20	Positive	206.1	160	0.066	10	30
0,15 - 100	5.79	11	Indole-3-acetamide	1H-Indole-d5-3-acetamide	40	Positive	175.1	130.1	0.066	19	15
1,5 - 1000	6.04	12	Kynurenic acid	Kynurenic Acid-d5	20	Positive	190.1	144.1	0.066	10	35
37,5 - 25000	7.05	13	Indole-3-lactic acid	Kynurenic Acid-d5	20	Negative	204.1	186.1	0.066	5	14
3,75 - 2500	7.25	14	Indole-3-lactic acid	I-ALD-13C	500	Positive	146.1	118.1	0.066	38	30
0,38 - 250	7.7	15	Tryptophol	Indoleacetic Acid-d4	1000	Positive	162.2	144.1	0.066	0	20
37,5 - 25000	7.7	16	Indole-3-acetic acid	Indoleacetic Acid-d4	1000	Positive	176.1	130.1	0.066	10	40
0,15 - 100	7.94	17	Melatonin	Melatonin-d4	2	Positive	233.2	174.1	0.066	38	12

## Sheet: Quality Control
Quality controls
	Relative deviation from target concentrations
	QC Low (%)		QC Medium (%)		QC High (%)				Target concentrations (pmol/mL)
	Start	End	Start	End	Start	End			QC Low	QC Medium	QC High
Picolinic acid	1069.4 ( 6.9 )	1068.7 ( 6.9 )	9922.1 ( -0.8 )	10912.3 ( 9.1 )	20838.8 ( 4.2 )	20360.1 ( 1.8 )		Picolinic acid	1000	10000	20000
3-OH-Kynurenine	41.3 ( 3.4 )	38.4 ( -3.9 )	395 ( -1.2 )	419 ( 4.7 )	840 ( 5 )	835.5 ( 4.4 )		3-OH-Kynurenine	40	400	800
Quinolinic acid	30.3 ( 0.8 )	32.9 ( 9.5 )	301.3 ( 0.4 )	314.4 ( 4.8 )	609.2 ( 1.5 )	618.7 ( 3.1 )		Quinolinic acid	30	300	600
Serotonine	1018 ( 1.8 )	1021.5 ( 2.1 )	10018.2 ( 0.2 )	9165.3 ( -8.3 )	18134.9 ( -9.3 )	18011.3 ( -9.9 )		Serotonine	1000	10000	20000
5-OH-Tryptophane	21.3 ( 6.7 )	19.8 ( -1.3 )	211.2 ( 5.6 )	189.7 ( -5.2 )	419.9 ( 5 )	389.7 ( -2.6 )		5-OH-Tryptophane	20	200	400
Kynurenine	1105.9 ( 10.6 )	1071.9 ( 7.2 )	9261.1 ( -7.4 )	9512.1 ( -4.9 )	18843.7 ( -5.8 )	19517.6 ( -2.4 )		Kynurenine	1000	10000	20000
3-OH-Anthranilic acid	36.5 ( -8.6 )	36.5 ( -8.8 )	435.1 ( 8.8 )	361.6 ( -9.6 )	856.2 ( 7 )	726.7 ( -9.2 )		3-OH-Anthranilic acid	40	400	800
Tryptamine	22.2 ( 11.1 )	21.1 ( 5.4 )	194.4 ( -2.8 )	209.6 ( 4.8 )	394.7 ( -1.3 )	416.1 ( 4 )		Tryptamine	20	200	400
Tryptophane	8797.2 ( 10 )	8567.5 ( 7.1 )	75307 ( -5.9 )	71176.5 ( -11 )	146106.6 ( -8.7 )	150202.8 ( -6.1 )		Tryptophane	8000	80000	160000
5-OH-Indole acetic acid	80.9 ( 1.1 )	82.8 ( 3.5 )	824.5 ( 3.1 )	816.4 ( 2 )	1597.8 ( -0.1 )	1629.6 ( 1.8 )		5-OH-Indole acetic acid	80	800	1600
Indole-3-Sulfate	3193.2 ( 6.4 )	3158.7 ( 5.3 )	30381.1 ( 1.3 )	30721.4 ( 2.4 )	61417.2 ( 2.4 )	60546.8 ( 0.9 )		Indole-3-Sulfate	3000	30000	60000
N-acetyl-serotonine	4.3 ( 6.9 )	4.3 ( 8.7 )	41 ( 2.5 )	43.1 ( 7.7 )	78.2 ( -2.2 )	86.3 ( 7.9 )		N-acetyl-serotonine	4	40	80
Xanthurenic acid	38.6 ( -3.5 )	37.2 ( -7.1 )	392.8 ( -1.8 )	388.1 ( -3 )	816.1 ( 2 )	801.2 ( 0.2 )		Xanthurenic acid	40	400	800
Indole-3-acetamide	4.3 ( 6.4 )	3.8 ( -4.6 )	41.8 ( 4.5 )	39.8 ( -0.6 )	85.5 ( 6.9 )	79.3 ( -0.8 )		Indole-3-acetamide	4	40	80
Kynurenic acid	41.6 ( 4 )	41.1 ( 2.8 )	404.6 ( 1.2 )	405.7 ( 1.4 )	805.3 ( 0.7 )	833.9 ( 4.2 )		Kynurenic acid	40	400	800
Indole-3-Lactic acid	943.1 ( -5.7 )	922.9 ( -7.7 )	9645.5 ( -3.5 )	9887 ( -1.1 )	19584.5 ( -2.1 )	18584.7 ( -7.1 )		Indole-3-Lactic acid	1000	10000	20000
Indole-3-Aldehyde	102.5 ( 2.5 )	105.1 ( 5.1 )	1005.3 ( 0.5 )	991.6 ( -0.8 )	2034.9 ( 1.7 )	2042.2 ( 2.1 )		Indole-3-Aldehyde	100	1000	2000
Indole-3-Acetic acid	1061.3 ( 6.1 )	1058.2 ( 5.8 )	9885 ( -1.2 )	10207 ( 2.1 )	19771.8 ( -1.1 )	20306.8 ( 1.5 )		Indole-3-Acetic acid	1000	10000	20000
Tryptophol	9.7 ( -3.5 )	10 ( 0.1 )	105.2 ( 5.2 )	105.4 ( 5.4 )	215.7 ( 7.9 )	192 ( -4 )		Tryptophol	10	100	200
Melatonine	4.2 ( 4.4 )	4.2 ( 5.6 )	41 ( 2.4 )	42.4 ( 5.9 )	81.7 ( 2.1 )	83 ( 3.8 )		Melatonine	4	40	80
